# Supplementary material for: Tolerance and Excretion of the Mycotoxins Aflatoxin B1, Zearalenone, Deoxynivalenol, and Ochratoxin A by Alphitobius diaperinus and Hermetia illucens from Contaminated Substrates
Source: PubMed Central journal article supplement (PMC5848191; doi:10.3390/toxins10020091), 2018-02-24
Supplement: toxins-10-00091-s001.pdf [file toxins-10-00091-s001.pdf]

## Supplementary Materials: Tolerance and excretion of the mycotoxins aflatoxin B1, zearalenone, deoxynivalenol and ochratoxin A by *Alphitobius diaperinus* and *Hermetia illucens* from contaminated substrates

Louise Camenzuli, Ruud Van Dam, Rob Andriessen, Jeroen Van Schelt, and H.J. (Ine) Van der Fels-Klerx

**Table S1.** Survival rate (%), live weights (mg) and dry matter content (%), all including the standard deviation (n=3) of the black soldier fly and the lesser mealworm larvae at the different treatments.

|                   |         | Black soldier fly larvae |                            |                        | Lesser mealworm larvae |                            |                        |
|-------------------|---------|--------------------------|----------------------------|------------------------|------------------------|----------------------------|------------------------|
|                   |         | Survival rate (%)        | Live weight per larva (mg) | Dry matter content (%) | Survival rate (%)      | Live weight per larva (mg) | Dry matter content (%) |
| Control           |         | 98 ± 1                   | 180.6 ± 0.9                | 40.3 ± 1.0             | 74 ± 2                 | 19.6 ± 0.8                 | 33.2 ± 0.2             |
| Control + Solvent |         | 99 ± 0                   | 178.8 ± 1.4                | 39.8 ± 0.0             | 82 ± 2                 | 18.4 ± 0.5                 | 33.0 ± 0.1             |
| Afb1              | Level 1 | 100 ± 1                  | 172.3 ± 1.1                | 41.2 ± 0.2             | 81 ± 4                 | 18.2 ± 1.4                 | 33.4 ± 0.6             |
|                   | Level 2 | 98 ± 2                   | 185.4 ± 4.4                | 39.4 ± 0.2             | 83 ± 4                 | 17.0 ± 0.9                 | 32.6 ± 0.3             |
|                   | Level 3 | 98 ± 1                   | 185.8 ± 6.3                | 38.9 ± 0.4             | 79 ± 4                 | 18.9 ± 1.2                 | 32.9 ± 0.3             |
| DON               | Level 1 | 98 ± 2                   | 188.2 ± 4.4                | 38.2 ± 0.9             | 75 ± 8                 | 16.7 ± 1.1                 | 32.4 ± 0.5             |
|                   | Level 2 | 99 ± 1                   | 184.5 ± 3.0                | 38.3 ± 0.1             | 77 ± 2                 | 17.3 ± 1.5                 | 33.2 ± 0.1             |
|                   | Level 3 | 98 ± 2                   | 186.8 ± 4.3                | 38.2 ± 0.3             | 81 ± 5                 | 17.2 ± 0.2                 | 33.4 ± 0.2             |
| ZEN               | Level 1 | 98 ± 2                   | 189.9 ± 6.6                | 38.7 ± 0.7             | 78 ± 2                 | 18.8 ± 1.6                 | 33.4 ± 0.9             |
|                   | Level 2 | 99 ± 1                   | 185.6 ± 4.1                | 40.5 ± 1.9             | 71 ± 5                 | 16.8 ± 1.3                 | 33.0 ± 0.1             |
|                   | Level 3 | 96 ± 2                   | 184.8 ± 2.7                | 40.0 ± 1.6             | 80 ± 2                 | 17.4 ± 0.7                 | 33.1 ± 0.1             |
| OTA               | Level 1 | 98 ± 2                   | 188.7 ± 1.2                | 37.6 ± 0.3             | 78 ± 4                 | 17.3 ± 0.3                 | 33.3 ± 0.1             |
|                   | Level 2 | 98 ± 1                   | 181.0 ± 5.5                | 39.0 ± 0.3             | 79 ± 4                 | 19.5 ± 0.3                 | 33.8 ± 0.5             |
|                   | Level 3 | 98 ± 1                   | 190.9 ± 5.4                | 39.7 ± 1.3             | 77 ± 3                 | 16.4 ± 0.8                 | 32.9 ± 0.5             |
| Mixture           | Level 1 | 98 ± 2                   | 187.4 ± 3.7                | 39.1 ± 0.7             | 79 ± 0                 | 16.9 ± 1.3                 | 32.8 ± 0.3             |
|                   | Level 2 | 94 ± 7                   | 188.9 ± 3.1                | 38.2 ± 0.1             | 75 ± 7                 | 19.9 ± 0.5                 | 34.5 ± 0.3             |
|                   | Level 3 | 98 ± 2                   | 191.2 ± 4.2                | 38.7 ± 1.0             | 71 ± 8                 | 18.8 ± 0.2                 | 34.1 ± 0.3             |

**Table S2.** Concentrations ( $\pm$  standard deviation (n=3) of mycotoxins AfB1, DON, ZEN and OTA in larvae, residual material (spiked feed) and residual material (gut clean) of the black soldier fly (BSF) and lesser mealworm (LMW). Note respective units above each section.

|                   |    | Black soldier fly larvae            |                                     |                                     | Lesser mealworm larvae              |                                     |                                     |
|-------------------|----|-------------------------------------|-------------------------------------|-------------------------------------|-------------------------------------|-------------------------------------|-------------------------------------|
|                   |    | Larvae                              | Residual material (spiked feed)     | Residual material (gut clean)       | Larvae                              | Residual material (spiked feed)     | Residual material (gut clean)       |
|                   |    | $\mu\text{g}/\text{kg}_{\text{dw}}$ | $\mu\text{g}/\text{kg}_{\text{dw}}$ | $\mu\text{g}/\text{kg}_{\text{dw}}$ | $\mu\text{g}/\text{kg}_{\text{dw}}$ | $\mu\text{g}/\text{kg}_{\text{dw}}$ | $\mu\text{g}/\text{kg}_{\text{dw}}$ |
| Control           |    | <LOQ                                | <LOQ                                | <LOQ                                | <LOQ                                | <LOQ                                | <LOQ                                |
| Control + solvent |    | <LOQ                                | <LOQ                                | <LOQ                                | <LOQ                                | <LOQ                                | <LOQ                                |
| LOQ               |    | 1                                   | 1                                   | 1                                   | 1                                   | 1                                   | 1                                   |
| AfB1              | L1 | <1                                  | 5.5 $\pm$ 0.5                       | <1                                  | <1                                  | 5.7 $\pm$ 0.4                       | <1                                  |
|                   | L2 | <1                                  | 62.0 $\pm$ 3.6                      | 1.8 $\pm$ 0.1                       | <1                                  | 61.7 $\pm$ 1.5                      | <1                                  |
|                   | L3 | <1                                  | 303.3 $\pm$ 15.3                    | 5.3 $\pm$ 1.0                       | <1                                  | 326.7 $\pm$ 11.5                    | <1                                  |
|                   | M1 | <1                                  | 13.7 $\pm$ 1.2                      | <1                                  | <1                                  | 17.7 $\pm$ 1.2                      | <1                                  |
|                   | M2 | <1                                  | 156.7 $\pm$ 20.8                    | 1.8 $\pm$ 0.1                       | <1                                  | 153.3 $\pm$ 5.8                     | <1                                  |
|                   | M3 | <1                                  | 353.3 $\pm$ 25.2                    | 4.6 $\pm$ 0.1                       | <1                                  | 413.3 $\pm$ 11.5                    | <1                                  |
|                   |    | $\mu\text{g}/\text{kg}_{\text{dw}}$ | $\text{mg}/\text{kg}_{\text{dw}}$   | $\text{mg}/\text{kg}_{\text{dw}}$   | $\mu\text{g}/\text{kg}_{\text{dw}}$ | $\text{mg}/\text{kg}_{\text{dw}}$   | $\mu\text{g}/\text{kg}_{\text{dw}}$ |
| LOQ               |    | 80                                  | 0.2                                 | 0.2                                 | 200                                 | 0.2                                 | 200                                 |
| DON               | L1 | <80                                 | 7.7 $\pm$ 2.9                       | 0.3 $\pm$ 0.07                      | <200                                | 4.3 $\pm$ 0.2                       | <200                                |
|                   | L2 | 129.3 $\pm$ 31.0                    | 86.3 $\pm$ 25.7                     | 2.5 $\pm$ 0.5                       | <200                                | 44.7 $\pm$ 2.1                      | <200                                |
|                   | L3 | 256.7 $\pm$ 15.3                    | 316.7 $\pm$ 60.2                    | 5.5 $\pm$ 1.2                       | <200                                | 110.0 $\pm$ 0.0                     | 263.3 $\pm$ 5.8                     |
|                   | M1 | <80                                 | 15.7 $\pm$ 0.6                      | 0.2 $\pm$ 0.04                      | <200                                | 4.7 $\pm$ 0.2                       | <200                                |
|                   | M2 | 109.5 $\pm$ 29.0                    | 150.0 $\pm$ 17.3                    | 1.8 $\pm$ 0.1                       | <200                                | 47.3 $\pm$ 2.1                      | <200                                |
|                   | M3 | 176.7 $\pm$ 11.5                    | 296.7 $\pm$ 11.6                    | 4.2 $\pm$ 0.7                       | <200                                | 116.7 $\pm$ 5.8                     | <200                                |
|                   |    | $\mu\text{g}/\text{kg}_{\text{dw}}$ | $\text{mg}/\text{kg}_{\text{dw}}$   | $\mu\text{g}/\text{kg}_{\text{dw}}$ | $\mu\text{g}/\text{kg}_{\text{dw}}$ | $\text{mg}/\text{kg}_{\text{dw}}$   | $\mu\text{g}/\text{kg}_{\text{dw}}$ |
| LOQ               |    | 20                                  | 0.02                                | 20                                  | 20                                  | 0.02                                | 20                                  |

|     |    |                     |                     |                     |                     |                     |                     |
|-----|----|---------------------|---------------------|---------------------|---------------------|---------------------|---------------------|
| ZEN | L1 | <20                 | 0.7±0.04            | <20                 | <20                 | 0.28±0.01           | <20                 |
|     | L2 | <20                 | 6.6±0.4             | 183.3±35.1          | <20                 | 3.0±0.06            | <20                 |
|     | L3 | 27.5±6.4            | 35.3±3.2            | 690.0±192.9         | <20                 | 13.7±1.2            | <20                 |
|     | M1 | <20                 | 0.99±0.1            | <20                 | <20                 | 0.49±0.03           | <20                 |
|     | M2 | <20                 | 10.2±0.8            | 78.7±5.8            | <20                 | 4.3±0.06            | <20                 |
|     | M3 | <20                 | 22.7±2.1            | 226.7±106.9         | <20                 | 12.7±0.6            | <20                 |
|     |    | µg/kg <sub>dw</sub> | mg/kg <sub>dw</sub> | µg/kg <sub>dw</sub> | µg/kg <sub>dw</sub> | mg/kg <sub>dw</sub> | µg/kg <sub>dw</sub> |
| LOQ |    | 1                   | 0.002               | 2                   | 1                   | 0.002               | 2                   |
| OTA | L1 | <1                  | 0.4±0.03            | 5.1±0.7             | <1                  | 0.21±0.01           | <2                  |
|     | L2 | 2.6±0.6             | 5.1±0.6             | 45.0±8.7            | <1                  | 2.4±0.2             | <2                  |
|     | L3 | 2.2±0.9             | 3.5±0.3             | 26.3±2.5            | <1                  | 1.9±0.1             | <2                  |
|     | M1 | <1                  | 0.2±0.02            | <2                  | <1                  | 0.12±0.01           | <2                  |
|     | M2 | 1.8±0.8             | 2.5±0.3             | 27.3±4.2            | <1                  | 1.1±0.06            | <2                  |
|     | M3 | 3.9±0.9             | 5.0±0.5             | 69.0±16.4           | <1                  | 3.1±0.1             | 2.4±0.4             |

**Table S3:** Average mass balance percentages ( $\pm$  standard deviation) n=3) include metabolites measured above the limit of quantification. See Table 2 for detected Aflatoxin B1 (Metabolite 1= Aflatoxicol; metabolite 2 = Aflatoxin M1) and zearalenone (Metabolite 1=  $\alpha$ -zearalenol; metabolite 2 =  $\beta$ -zearalenol) metabolites.

## Average and SD for mass balance results

| LMW  |    | % parent (larvae) | % metabolite 1 (larvae) | % metabolite 2 (larvae) | % parent (RM spiked feed) | % metabolite 1 (RM spiked feed) | % metabolite 2 (RM spiked feed) | % parent (RM gut clean) | % metabolite 1 (RM gut clean) | % metabolite 2 (RM gut clean) |
|------|----|-------------------|-------------------------|-------------------------|---------------------------|---------------------------------|---------------------------------|-------------------------|-------------------------------|-------------------------------|
| AfB1 | L1 | 0                 | 0                       | 0                       | 56 $\pm$ 4                | 0                               | 0                               | 0                       | 0                             | 0                             |
|      | L2 | 0                 | 0                       | 0                       | 77 $\pm$ 2                | 0                               | 2 $\pm$ 0.3                     | 0                       | 0                             | 0                             |
|      | L3 | 0                 | 0                       | 0                       | 67 $\pm$ 2                | 0.3 $\pm$ 0.01                  | 2 $\pm$ 0.2                     | 0                       | 0                             | 0                             |
|      | M1 | 0                 | 0                       | 0                       | 79 $\pm$ 5                | 0                               | 0                               | 0                       | 0                             | 0                             |
|      | M2 | 0                 | 0                       | 0                       | 68 $\pm$ 3                | 0                               | 3 $\pm$ 0.5                     | 0                       | 0                             | 0                             |
|      | M3 | 0                 | 0                       | 0                       | 78 $\pm$ 3                | 0.3 $\pm$ 0.04                  | 2 $\pm$ 0.1                     | 0                       | 0                             | 0                             |
| DON  | L1 | 0                 | 0                       | 0                       | 90 $\pm$ 3                | 0                               | 0                               | 0                       | 0                             | 0                             |
|      | L2 | 0                 | 0                       | 0                       | 96 $\pm$ 4                | 0                               | 0                               | 0                       | 0                             | 0                             |
|      | L3 | 0                 | 0                       | 0                       | 80 $\pm$ 1                | 0                               | 0                               | 0.1 $\pm$ 0             | 0                             | 0                             |
|      | M1 | 0                 | 0                       | 0                       | 92 $\pm$ 3                | 0                               | 0                               | 0                       | 0                             | 0                             |
|      | M2 | 0                 | 0                       | 0                       | 91 $\pm$ 3                | 0                               | 0                               | 0                       | 0                             | 0                             |
|      | M3 | 0                 | 0                       | 0                       | 94 $\pm$ 5                | 0                               | 0                               | 0                       | 0                             | 0                             |
| ZEN  | L1 | 0                 | 0                       | 0                       | 81 $\pm$ 1                | 7 $\pm$ 0.6                     | 0                               | 0                       | 0                             | 0                             |
|      | L2 | 0                 | 0                       | 0                       | 99 $\pm$ 2                | 7 $\pm$ 0.4                     | 3 $\pm$ 0.3                     | 0                       | 0                             | 0                             |
|      | L3 | 0                 | 0                       | 0                       | 84 $\pm$ 6                | 5 $\pm$ 0.5                     | 2 $\pm$ 0.2                     | 0                       | 0                             | 0                             |
|      | M1 | 0                 | 0                       | 0                       | 98 $\pm$ 6                | 6 $\pm$ 0.5                     | 1 $\pm$ 1                       | 0                       | 0                             | 0                             |
|      | M2 | 0                 | 0                       | 0                       | 90 $\pm$ 2                | 7 $\pm$ 0.9                     | 3 $\pm$ 0.3                     | 0                       | 0                             | 0                             |
|      | M3 | 0                 | 0                       | 0                       | 109 $\pm$ 4               | 6 $\pm$ 0.1                     | 2 $\pm$ 0.1                     | 0                       | 0                             | 0                             |
| OTA  | L1 | 0                 | 0                       | 0                       | 97 $\pm$ 4                | 0                               | 0                               | 0                       | 0                             | 0                             |
|      | L2 | 0                 | 0                       | 0                       | 111 $\pm$ 9               | 0                               | 0                               | 0                       | 0                             | 0                             |
|      | L3 | 0                 | 0                       | 0                       | 115 $\pm$ 5               | 0                               | 0                               | 0                       | 0                             | 0                             |
|      | M1 | 0                 | 0                       | 0                       | 116 $\pm$ 5               | 0                               | 0                               | 0                       | 0                             | 0                             |
|      | M2 | 0                 | 0                       | 0                       | 111 $\pm$ 6               | 0                               | 0                               | 0.05 $\pm$ 0.08         | 0                             | 0                             |
|      | M3 | 0                 | 0                       | 0                       | 126 $\pm$ 3               | 0                               | 0                               | 0.05 $\pm$ 0.01         | 0                             | 0                             |

| BSF  |    | % parent (larvae) | % metabolite 1 (larvae) | % metabolite 2 (larvae) | % parent (RM spiked feed) | % metabolite 1 (RM spiked feed) | % metabolite 2 (RM spiked feed) | % parent (RM gut clean) | % metabolite 1 (RM gut clean) | % metabolite 2 (RM gut clean) |
|------|----|-------------------|-------------------------|-------------------------|---------------------------|---------------------------------|---------------------------------|-------------------------|-------------------------------|-------------------------------|
| AfB1 | L1 | 0                 | 0                       | 0                       | 11±0.9                    | 0                               | 0                               | 0                       | 0                             | 0                             |
|      | L2 | 0                 | 0                       | 0                       | 17±1                      | 0                               | 0                               | 0.5±0.4                 | 0                             | 0                             |
|      | L3 | 0                 | 0                       | 0                       | 15±1                      | 0.5±0.1                         | 0                               | 0.4±0.05                | 0                             | 0                             |
|      | M1 | 0                 | 0                       | 0                       | 16±1                      | 0                               | 0                               | 0                       | 0                             | 0                             |
|      | M2 | 0                 | 0                       | 0                       | 17±2                      | 0                               | 0                               | 0.3±0.05                | 0                             | 0                             |
|      | M3 | 0                 | 0                       | 0                       | 15±3                      | 0.2±0.2                         | 0                               | 0.3±0.02                | 0                             | 0                             |
| DON  | L1 | 0                 | 0                       | 0                       | 37±15                     | 0                               | 0                               | 2±0.5                   | 0                             | 0                             |
|      | L2 | 0.2±0.03          | 0                       | 0                       | 43±12                     | 0                               | 0                               | 2±0.3                   | 0                             | 0                             |
|      | L3 | 0.08±0.00         | 0                       | 0                       | 54±15                     | 0                               | 0                               | 1±0.2                   | 0                             | 0                             |
|      | M1 | 0                 | 0                       | 0                       | 79±4                      | 0                               | 0                               | 1±0.2                   | 0                             | 0                             |
|      | M2 | 0.06±0.05         | 0                       | 0                       | 73±8                      | 0                               | 0                               | 1±0.2                   | 0                             | 0                             |
|      | M3 | 0.06±0.01         | 0                       | 0                       | 54±13                     | 0                               | 0                               | 1±0.1                   | 0                             | 0                             |
| ZEN  | L1 | 0                 | 0                       | 0                       | 48±6                      | 44±4                            | 12±1                            | 0                       | 0                             | 0                             |
|      | L2 | 0                 | 0.06±0.05               | 0                       | 51±2                      | 56±3                            | 18±0.8                          | 2±0.4                   | 1±0.4                         | 0.4±0.2                       |
|      | L3 | 0.05±0.05         | 0.07±0.01               | 0.02±0.00               | 55±9                      | 58±15                           | 17±3                            | 1±0.4                   | 1±0.4                         | 0.4±0.1                       |
|      | M1 | 0                 | 0                       | 0                       | 51±5                      | 38±6                            | 10±1                            | 0                       | 1±0.8                         | 0.4±0.7                       |
|      | M2 | 0                 | 0.1±0.03                | 0                       | 54±5                      | 67±16                           | 19±5                            | 0.6±0.1                 | 2±0.3                         | 0.5±0.5                       |
|      | M3 | 0                 | 0.1±0.02                | 0.02±0.02               | 43±7                      | 55±13                           | 17±5                            | 0.6±0.2                 | 2±0.1                         | 0.3±0.1                       |
| OTA  | L1 | 0                 | 0                       | 0                       | 52±4                      | 0                               | 0                               | 0.8±0.1                 | 0                             | 0                             |
|      | L2 | 0.05±0.01         | 0                       | 0                       | 55±13                     | 0                               | 0                               | 0.7±0.2                 | 0                             | 0                             |
|      | L3 | 0.06±0.03         | 0                       | 0                       | 56±9                      | 0                               | 0                               | 0.5±0.05                | 0                             | 0                             |
|      | M1 | 0.08±0.1          | 0                       | 0                       | 41±5                      | 0                               | 0                               | 0.3±0.4                 | 0                             | 0                             |
|      | M2 | 0.08±0.03         | 0                       | 0                       | 61±8                      | 0                               | 0                               | 0.9±0.1                 | 0                             | 0                             |
|      | M3 | 0.07±0.01         | 0                       | 0                       | 45±7                      | 0                               | 0                               | 0.8±0.2                 | 0                             | 0                             |

**Table S4.** Instrumental MS/MS parameters of mycotoxins analysed in positive ionisation mode

| Component                                                  | Rt (min) | Q1<br>(m/z) | Q3<br>(m/z) | DP<br>(V) | EP<br>(V) | CE<br>(V) | CXP<br>(V) |
|------------------------------------------------------------|----------|-------------|-------------|-----------|-----------|-----------|------------|
| 15-Acetyl-DON (qn) <sup>1</sup>                            | 3.3      | 355.9       | 137.1       | 40        | 10        | 22        | 10         |
| 15-Acetyl-DON (ql) <sup>2</sup>                            | 3.3      | 355.9       | 321.1       | 40        | 10        | 17        | 20         |
| Aflatoxin B <sub>1</sub> (qn)                              | 5.0      | 313.0       | 285.2       | 40        | 10        | 33        | 16         |
| Aflatoxin B <sub>1</sub> (ql)                              | 5.0      | 313.0       | 128.1       | 40        | 10        | 91        | 10         |
| Deoxynivalenol (qn)                                        | 2.7      | 297.0       | 249.0       | 30        | 10        | 15        | 15         |
| Deoxynivalenol (ql)                                        | 2.7      | 297.0       | 231.0       | 30        | 10        | 17        | 15         |
| <sup>13</sup> C <sub>3</sub> -Caffeine (Internal standard) | 3.3      | 198.0       | 140.0       | 40        | 10        | 29        | 12         |
| Ochratoxin A (qn)                                          | 6.4      | 404.0       | 239.0       | 40        | 10        | 33        | 16         |
| Ochratoxin A (ql)                                          | 6.4      | 404.0       | 102.0       | 40        | 10        | 91        | 14         |
| Aflatoxicol (qn)                                           | 5.3      | 297.1       | 269.0       | 66        | 10        | 29        | 16         |
| Aflatoxicol (ql)                                           | 5.3      | 297.1       | 114.9       | 66        | 10        | 81        | 12         |
| Aflatoxin M <sub>1</sub> (qn)                              | 4.1      | 328.9       | 272.9       | 61        | 10        | 33        | 18         |
| Aflatoxin M <sub>1</sub> (ql)                              | 4.1      | 328.9       | 229.0       | 61        | 10        | 55        | 16         |
| Aflatoxin P <sub>1</sub> (qn)                              | 4.3      | 299.0       | 271.0       | 101       | 10        | 33        | 18         |
| Aflatoxin P <sub>1</sub> (ql)                              | 4.3      | 299.0       | 114.9       | 101       | 10        | 71        | 12         |
| Aflatoxin Q <sub>1</sub> (qn)                              | 3.9      | 329.1       | 310.8       | 71        | 10        | 29        | 16         |
| Aflatoxin Q <sub>1</sub> (ql)                              | 3.9      | 329.1       | 177.0       | 71        | 10        | 45        | 22         |
| <sup>13</sup> C <sub>17</sub> -Aflatoxin B <sub>1</sub>    | 5.0      | 330.1       | 301.1       | 40        | 10        | 33        | 16         |
| <sup>13</sup> C <sub>15</sub> -Deoxynivalenol              | 2.7      | 312.2       | 263.2       | 30        | 10        | 15        | 15         |
| <sup>13</sup> C <sub>20</sub> -Ochratoxin A                | 6.4      | 424.2       | 250.0       | 40        | 10        | 33        | 16         |

<sup>1</sup> qn = quantifier ions <sup>2</sup> ql = qualifier ion**Table S5.** Instrumental MS/MS parameters of mycotoxins analysed in negative ionisation mode.

| Component                                  | Rt (min) | Q1<br>(m/z) | Q3<br>(m/z) | DP<br>(V) | EP<br>(V) | CE<br>(V) | CXP<br>(V) |
|--------------------------------------------|----------|-------------|-------------|-----------|-----------|-----------|------------|
| DON-3-glucoside (qn) <sup>1</sup>          | 2.7      | 517.2       | 457.1       | -45       | -10       | -18       | -13        |
| DON-3-glucoside (ql) <sup>2</sup>          | 2.7      | 517.2       | 247.0       | -45       | -10       | -32       | -17        |
| 3-Acetyl-DON (qn)                          | 3.4      | 397.1       | 337.0       | -20       | -10       | -12       | -23        |
| 3-Acetyl-DON (ql)                          | 3.4      | 397.1       | 59.0        | -20       | -10       | -52       | -7         |
| β-Zearalenol (qn)                          | 6.0      | 319.3       | 160.0       | -110      | -10       | -41       | -13        |
| β-Zearalenol (ql)                          | 6.0      | 319.3       | 130.0       | -110      | -10       | -47       | -20        |
| Zearalenone (qn)                           | 6.5      | 317.1       | 175.0       | -175      | -10       | -32       | -15        |
| Zearalenone (ql)                           | 6.5      | 317.1       | 131.1       | -175      | -10       | -36       | -11        |
| α-Zearalenol (qn)                          | 6.6      | 319.2       | 160.0       | -110      | -10       | -41       | -13        |
| α-Zearalenol (ql)                          | 6.6      | 319.2       | 130.0       | -110      | -10       | -47       | -20        |
| <sup>13</sup> C <sub>18</sub> -Zearalenone | 6.5      | 335.2       | 185.1       | -175      | -10       | -32       | -15        |

<sup>1</sup> qn = quantifier ions <sup>2</sup> ql = qualifier ion

**Table S6.** Average recovery and within-lab reproducibility of mycotoxins in repeated analyses of a control sample (n=6)

| Component                | Level ( $\mu\text{g}/\text{kg}$ ) | Average recovery (%) | RSD <sub>wR</sub> |
|--------------------------|-----------------------------------|----------------------|-------------------|
| Aflatoxin B <sub>1</sub> | 5                                 | 100                  | 2.8               |
| Aflatoxicol              | 5                                 | 87                   | 17                |
| Aflatoxin M <sub>1</sub> | 5                                 | 91                   | 12                |
| Aflatoxin P <sub>1</sub> | 5                                 | 74                   | 36                |
| Aflatoxin Q <sub>1</sub> | 5                                 | 80                   | 12                |
| Deoxynivalenol           | 400                               | 92                   | 8.1               |
| 3-Acetyl-DON             | 200                               | 95                   | 22                |
| 15-Acetyl-DON            | 200                               | 92                   | 18                |
| DON-3-glucoside          | 250                               | 53                   | 17                |
| Zearalenone              | 100                               | 106                  | 4.7               |
| $\alpha$ -Zearalenol     | 25                                | 106                  | 12                |
| $\beta$ -Zearalenol      | 25                                | 111                  | 10                |
| Ochratoxin A             | 2                                 | 103                  | 20                |
